# Supplementary material
Source: PubMed Central journal article supplement (PMC5531606)
Supplement: NIHMS856234-supplement-supplemental_data_Mol_Neuro2015.pdf [file NIHMS856234-supplement-supplemental_data_Mol_Neuro2015.pdf]

OS Phagosomes Associated with LC3 and MREG

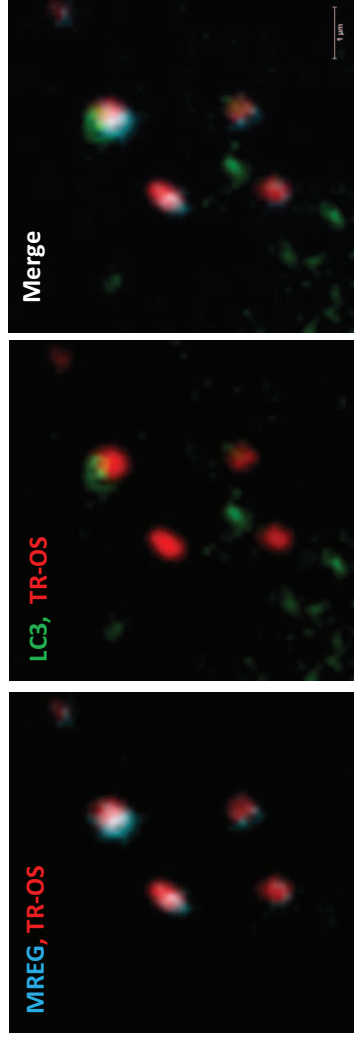

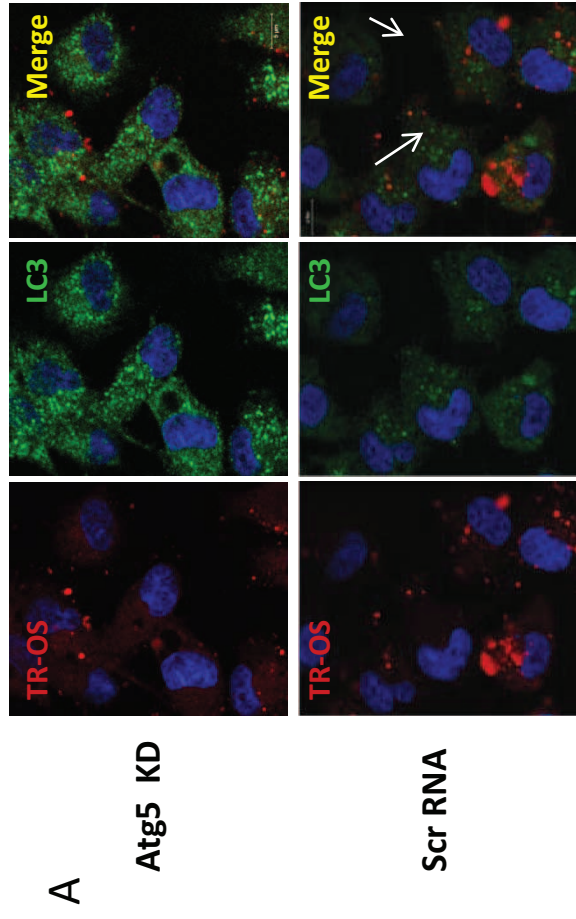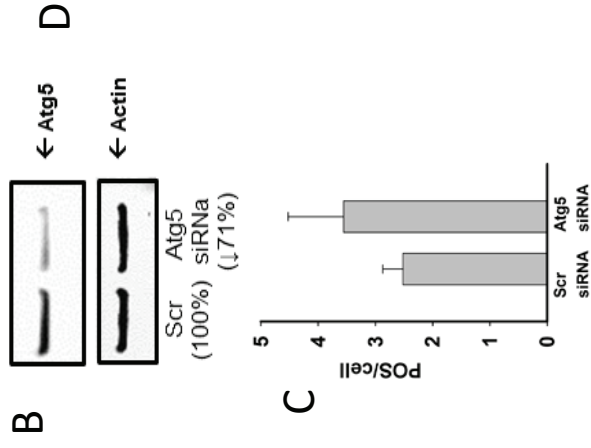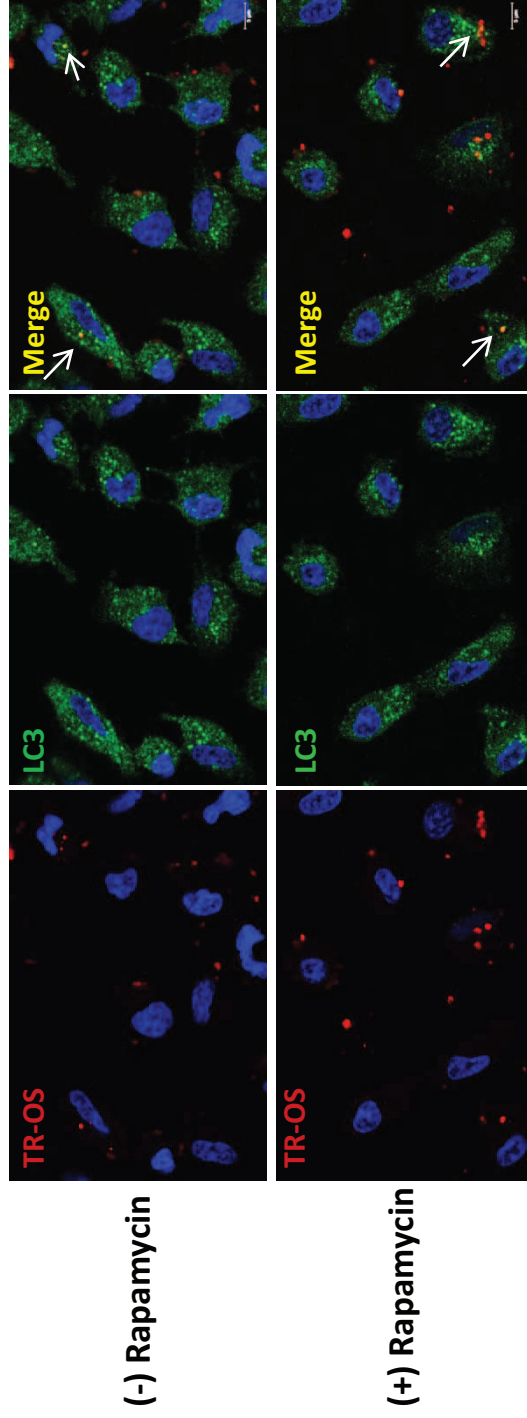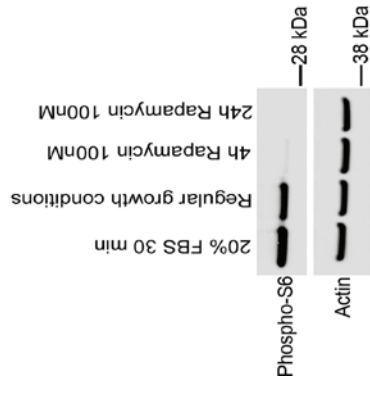

Supplemental Figure 2

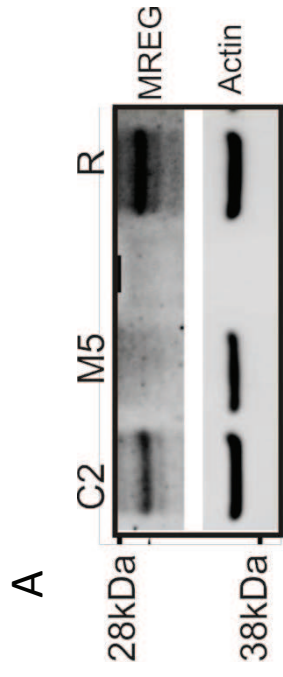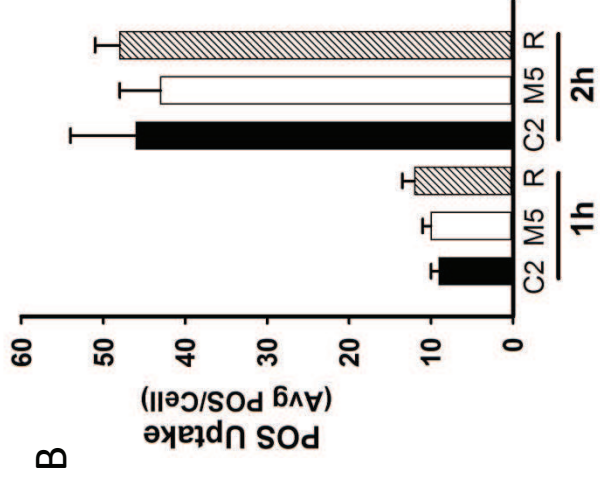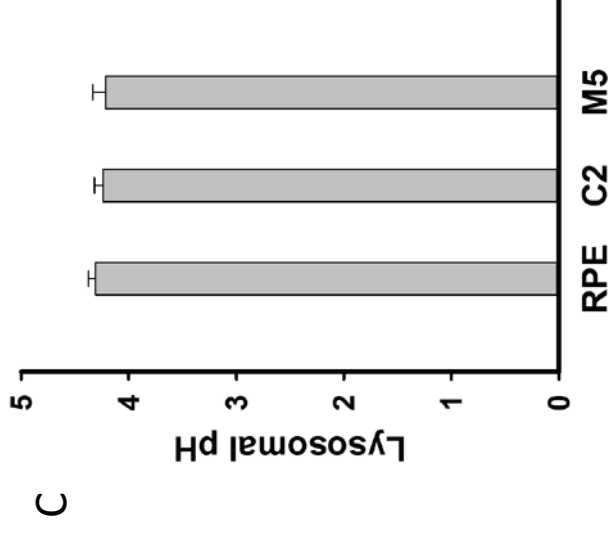

A

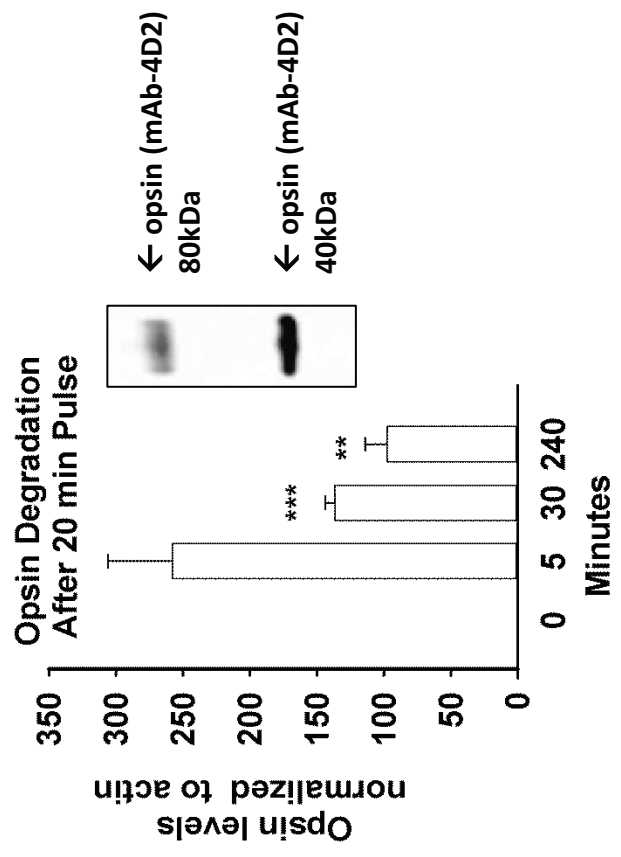

B

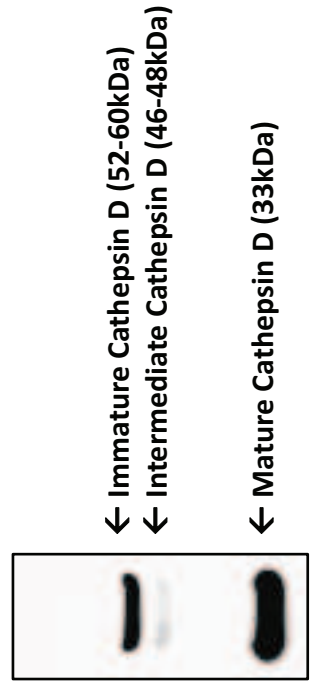

Supplemental Figure 4

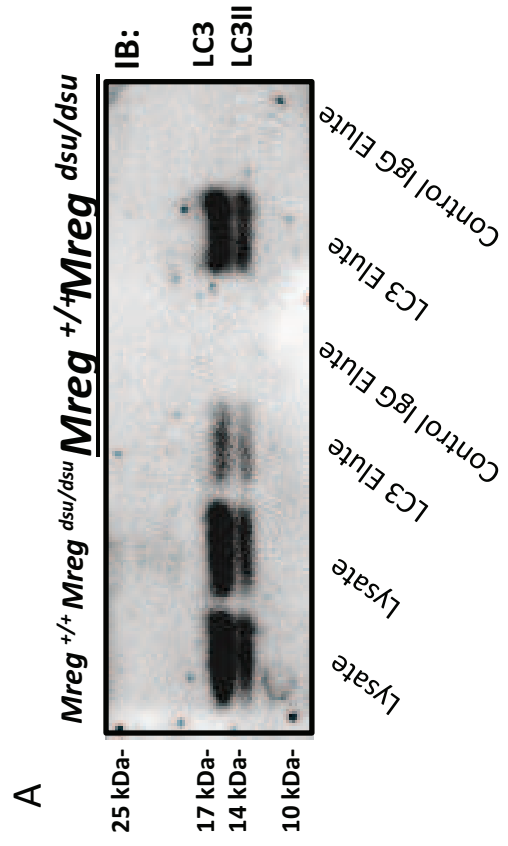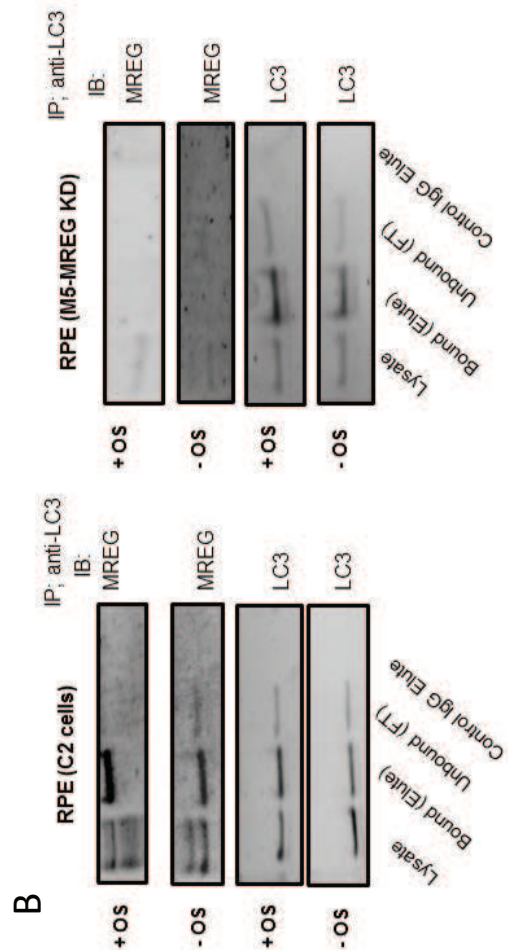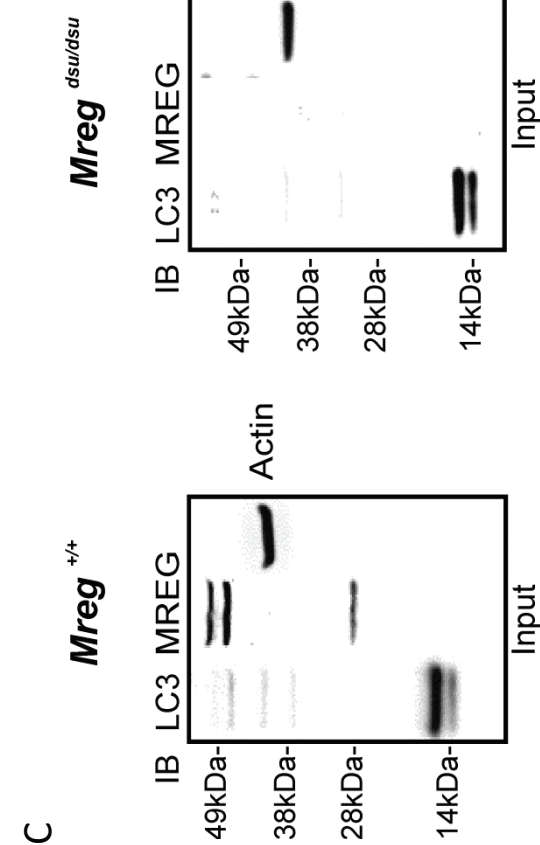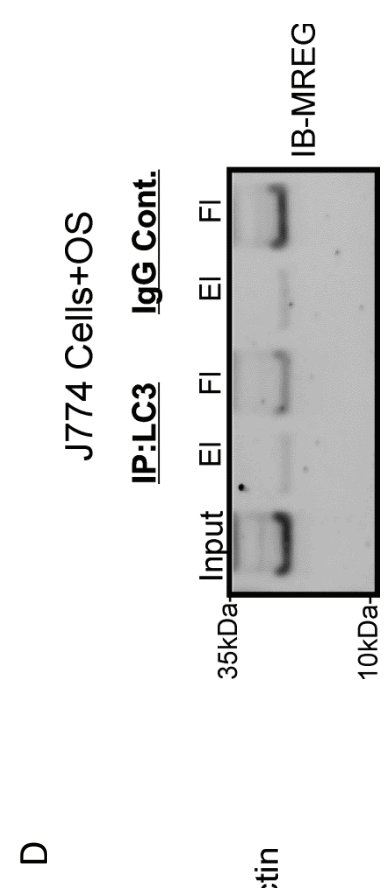

Supplemental Figure 5
